# Supplementary material for: High-efficiency green management of potato late blight by a self-assembled multicomponent nano-bioprotectant
Source: Springer Nature journal article supplement (doi:10.1038/s41467-023-41447-8), 2023-09-12
Supplement: 41467_2023_41447_MOESM1_ESM.pdf [file 41467_2023_41447_MOESM1_ESM.pdf]

**High-efficiency green management of potato late blight by a self-  
assembled multicomponent nano-bioprotectant**

Wang *et al.*

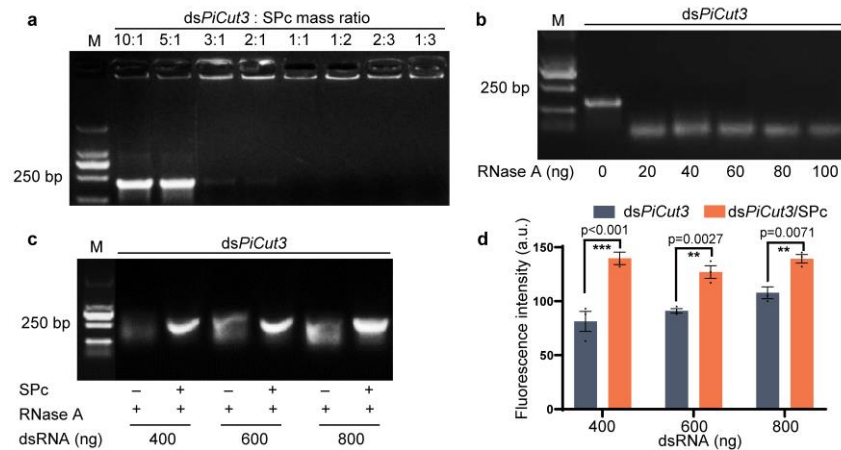

**Supplementary Figure 1. Enhanced stability of SPC-loaded dsRNA.** **a**, Gel electrophoresis assay of ds*PiCut3* retardation by SPC. 500 ng ds*PiCut3* was mixed with SPC at various mass ratios, and the mixture (8  $\mu$ L) was incubated and then analyzed. M: marker. Each treatment was repeated three times. **b**, ds*PiCut3* degradation by RNase A. One  $\mu$ g ds*PiCut3* was mixed with RNase A to prepare the reaction solution, and the mixture was incubated for 20 min at 37°C. Each treatment was repeated three times. **c**, **d**, Gel electrophoresis assay (**c**) and relative band density (**d**) of SPC-loaded ds*PiCut3* treated with RNase A. RNase A was used to treat the ds*PiCut3*/SPc complex. Then the ds*PiCut3*/SPc complex was decomplexed in 0.3% SDS solution. Each treatment was repeated three times. Analyzed by two-way ANOVA with Tukey's HSD multiple comparison post hoc test (\*\* $p < 0.01$  and \*\*\*  $p < 0.001$ ). Bars represent the mean  $\pm$  SE. Source data are provided as a Source Data file.

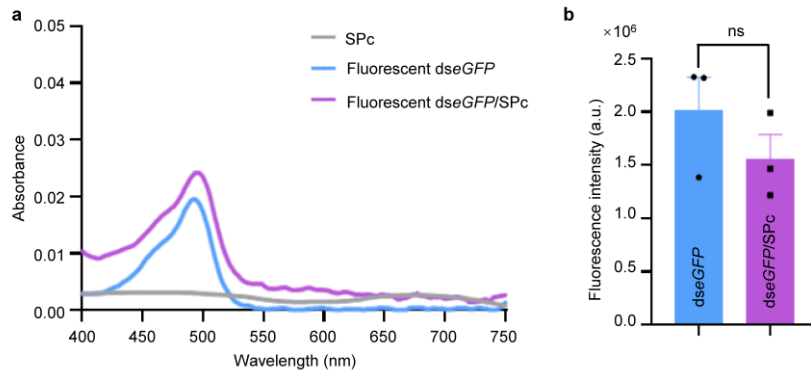

**Supplementary Figure 2. Fluorescence intensity of dseGFP assembled with SPc. a.**

The maximum absorptions of both fluorescent dseGFP and dseGFP/SPc complex were observed at 488-500 nm. The fluorescent dseGFP was mixed with SPc at the mass ratio of 1:1 (final concentration of dseGFP: 20 ng/μL). **b.** The fluorescence intensity of dseGFP and dseGFP/SPc complex. The comparison was conducted using independent *t*-test at the  $p < 0.05$  level of significance. Source data are provided as a Source Data file.

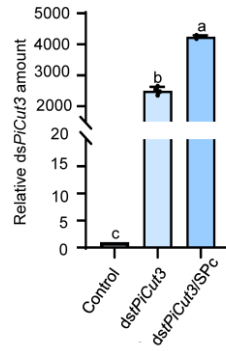

**Supplementary Figure 3. Higher relative amount of SPc-loaded *dsPiCut3* on plant leaves.** Bars represent the mean  $\pm$  SE. Different letters above each bar indicate significant differences at  $p < 0.05$  as determined by Tukey's HSD test. Source data are provided as a Source Data file.

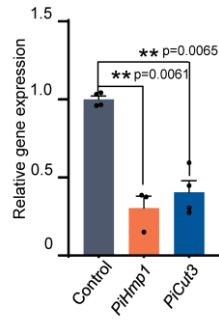

**Supplementary Figure 4. Gene silencing efficiency of ds*PiHmp1*+*PiCut3* complex without SPc loaded *in vitro*.** A mixture of *P. infestans* hyphae and spores (12 days) was collected and treated by ds*PiHmp1*+*PiCut3* complex without SPc loaded *in vitro* or ddH<sub>2</sub>O as a control respectively. Gene expression of the above mixture was examined at 12 h after the treatment by qPCR. Analyzed by two-way ANOVA with Tukey's HSD multiple comparison post hoc test (\*\* $p < 0.01$ ). Bars represent the mean  $\pm$  SE. Source data are provided as a Source Data file.

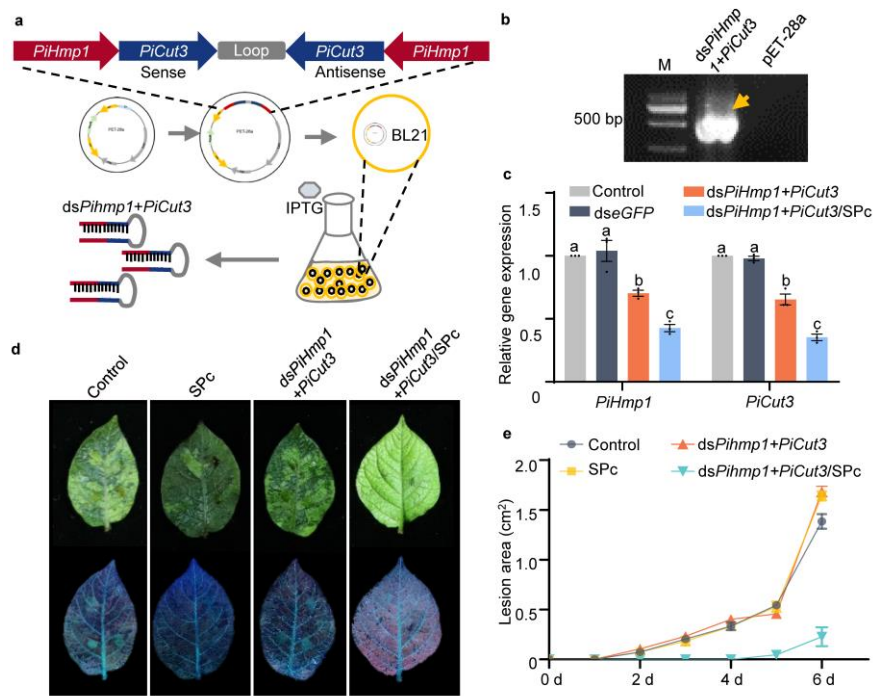

**Supplementary Figure 5. Construction of ds*PiHmp1*+*PiCut3*/SPc complex and its protection assay.** **a**, Reverse complementary fragments from *PiHmp1* and *PiCut3* were tandemly constructed into the pET28a expression vector, transformed into BL21 (DE3) RNaseIII- strain and then lysed by lysozyme to release ds*PiHmp1*+*PiCut3*. **b**, dsRNA expressed in pET28-BL21 (DE3) RNase III- *E. coli* expression system. Yellow arrow indicates the target dsRNA. M: marker. **c**, Gene silencing efficiency of ds*PiHmp1*+*PiCut3* and ds*PiHmp1*+*PiCut3*/SPc complex. A mixture of *P. infestans* hyphae and spores (12 days) was collected at 24 h after the treatment of ds*PiHmp1*+*PiCut3*. Different letters above each bar indicate significant differences at  $p < 0.05$  as determined by Tukey's HSD test. **d**, **e**, Enhanced protective effect of SPc-loaded ds*PiHmp1*+*PiCut3* toward potato leaves. Various formulations were sprayed onto leaves, and sporangia suspension was inoculated to plant leaves after 24 h. Pictures were acquired at 6 dpi, and then lesion area was measured ( $n=3$  biologically independent replicates). Bars represent the mean  $\pm$  SE. Source data are provided as a Source Data file.

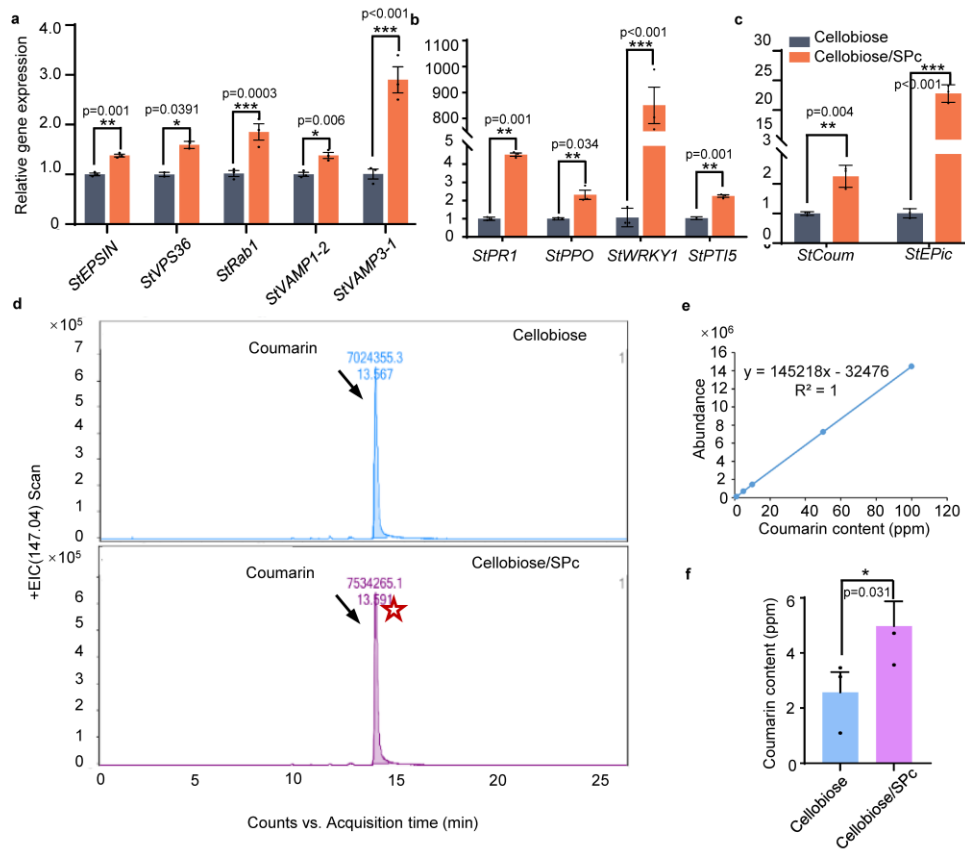

**Supplementary Figure 6. Elevated bioactivity of cellobiose with the aid of SPC.** **a-c**, SPC-loaded cellobiose up-regulated the expression of endocytosis-related genes, **(a)**, cellobiose-induced immunity genes, **(b)** and phytoalexin-related genes, **(c)** in potato leaves compared with cellobiose alone. Each treatment was repeated three times. **(a-c)**, Analyzed by two-way ANOVA with Tukey's HSD multiple comparison post hoc test) ( $*p < 0.1$ ,  $**p < 0.01$ ,  $***p < 0.001$ ). **d-f**, SPC-loaded cellobiose increased the coumarin content in potato leaves compared with cellobiose alone. **(d)** Chromatogram of coumarin. **(e)** Standard curve of coumarin for LC-MS/MS and **(f)** statistics of coumarin content. Bars represent the mean  $\pm$  SE. Statistical analysis was conducted using independent two-tailed  $t$ -test ( $*p < 0.05$ ,  $**p < 0.01$  and  $***p < 0.001$ ). Source data are provided as a Source Data file.

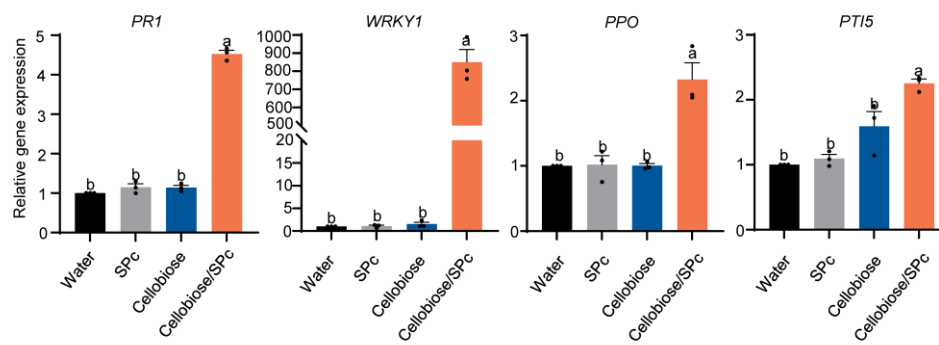

**Supplementary Figure 7. SPc exhibited no influence on the expression of plant immunity genes.** Bars represent the mean  $\pm$  SE. Different letters above each bar indicate significant differences at  $p < 0.05$  as determined by Tukey's HSD test. Each treatment was repeated three times. Source data are provided as a Source Data file.



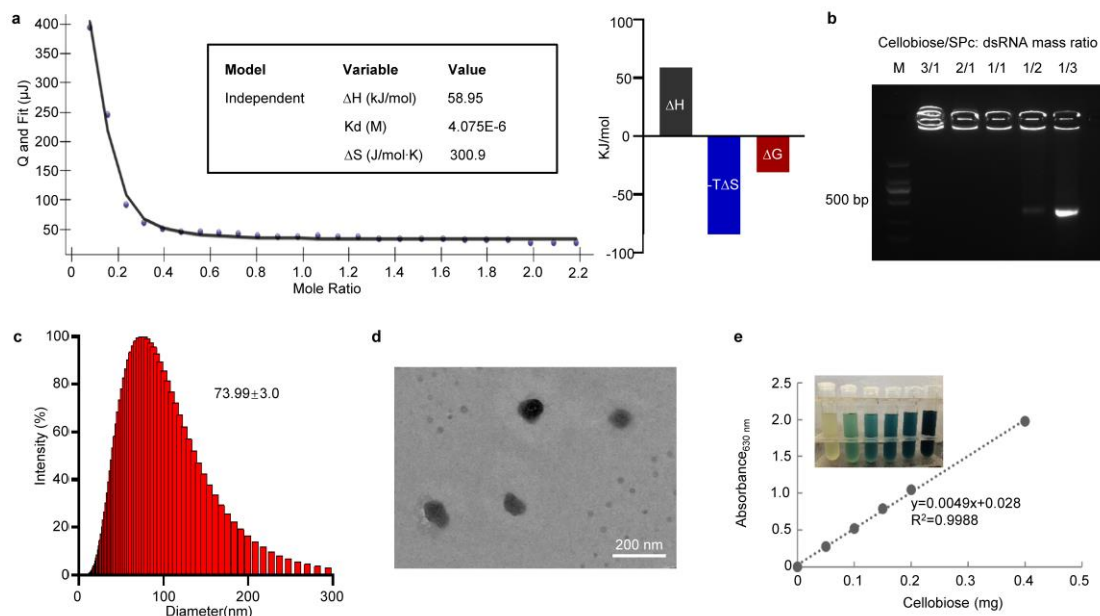

**Supplementary Figure 8. Self-assembly mechanism of cellobiose/SPc complex and component quantification of cellobiose/SPc/dsRNA complex.** **a**, ITC titration of cellobiose ( $0.138 \times 10^{-3}$  mol/L) into SPc solution ( $0.1 \times 10^{-3}$  mol/L). **b**, Gel electrophoresis assay of dsRNA retardation by cellobiose/SPc complex at various mass ratios. M: marker. **c**. The particle size distribution of SPc. The number indicates the average particle size. **d**. TEM image of SPc. **e**, Standard curve of cellobiose for anthrone-sulfuric acid colorimetry.  $n=3$  biological replicates. Source data are provided as a Source Data file.

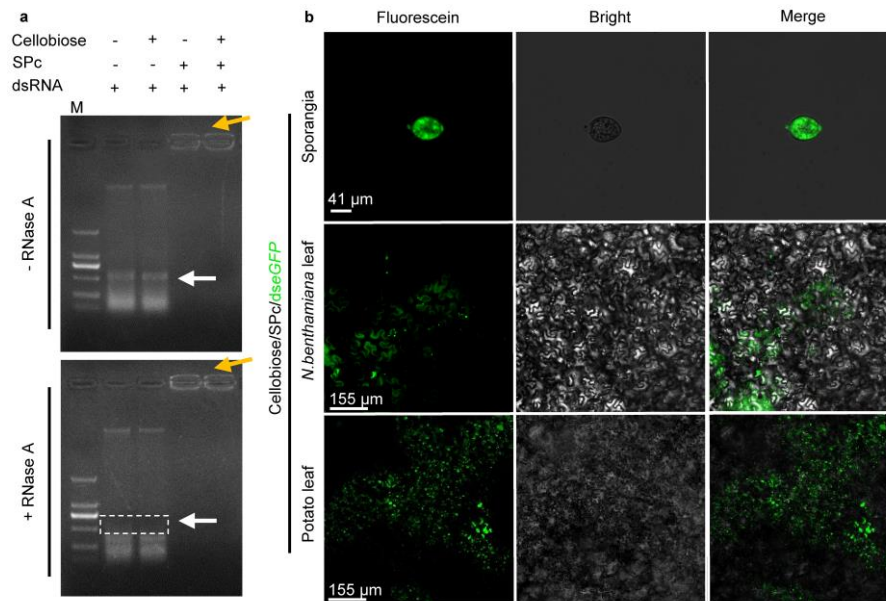

**Supplementary Figure 9. The multicomponent nano-bioprotectant protects and delivers dsRNA to cells. a,** Gel electrophoresis assay of multicomponent nano-bioprotectant treated with RNase A (100 ng). White arrow indicates the target dsRNA. Yellow arrow indicates the multicomponent nano-bioprotectant. M: marker. **b,** The multicomponent nano-bioprotectant can also be taken up by *P. infestans* sporangia, *N. benthamiana* and potato leaves. Multicomponent nano-bioprotectant was added to *P. infestans* sporangia (12 d), and fluorescence intensity was measured at 12 h after the application (n=3 biological replicates). Source data are provided as a Source Data file.

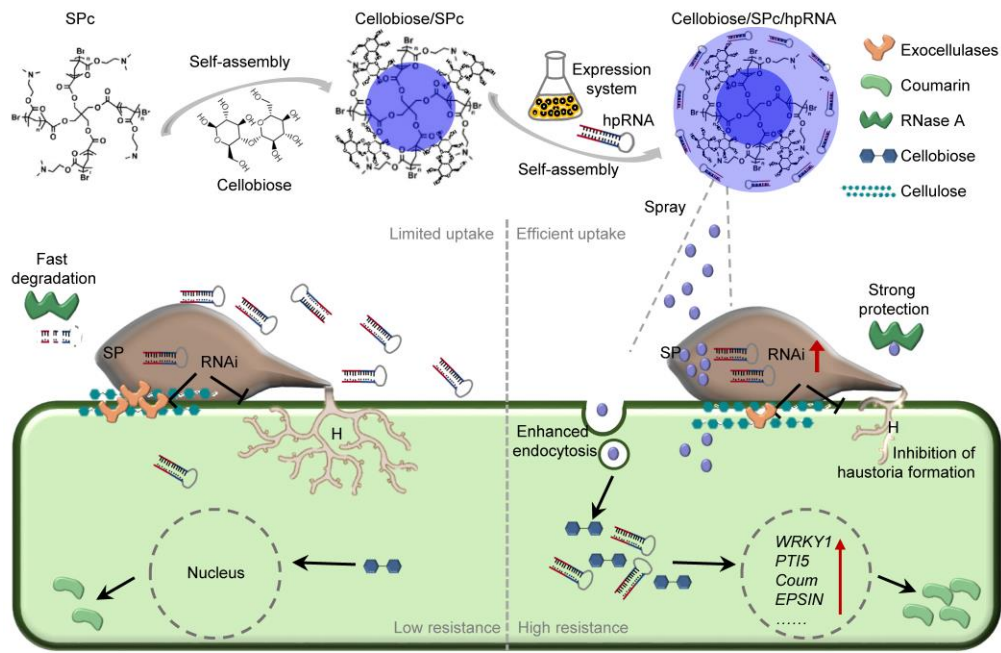

**Supplementary Figure 10. Schematic illustration of multicomponent nano-bioprotectant preparation and application.** SPc protects dsRNA from degradation by RNase A and increases dsRNA uptake by oomycetes and plants for highly-efficient dsRNA delivery. SPc decreases the particle size of the plant elicitor down to nanoscale, dramatically amplifying the plant defense responses against pathogens. SPc self-assembled with cellulose and dsRNA to form a multicomponent nano-bioprotectant that is applied to control potato late blight. The current study realizes the sustainable green management of potato late blight via two aspects pathogen inhibition and plant defense. SP: sporangium; H: haustoria.

**Supplementary Table 1. Loading capacity of SPc toward cellobiose.**

| <b>Cellobiose (mg)</b> | <b>SPc (mg)</b> | <b>Cellobiose/SPc (mg)</b> | <b>Drug loading content</b> | <b>Average drug loading content<sup>a</sup></b> |
|------------------------|-----------------|----------------------------|-----------------------------|-------------------------------------------------|
| 100                    | 100             | 114.5                      | 12.66%                      |                                                 |
| 100                    | 100             | 116                        | 13.79%                      | 12.70±1.07%                                     |
| 100                    | 100             | 113.2                      | 11.66%                      |                                                 |

<sup>a</sup> Mean ± SE.

**Supplementary Table 2. Primers used in the current study.**

| Application                                                                      | Primer name                  | Primer sequence (5'~3')                   | Accession number |
|----------------------------------------------------------------------------------|------------------------------|-------------------------------------------|------------------|
| PCR amplification for <i>P. infestans</i> genes to be essential for pathogenesis | <i>PiHmp1</i> -F             | TTGTTGACCAGCTCGTTGAG                      | XM_002908934.1   |
|                                                                                  | <i>PiHmp1</i> -R             | CCATCACCCCTTCTTCTTCCA                     |                  |
|                                                                                  | <i>PiCut3</i> -F             | CAACCACGTCGTGTCTATCG                      | XM_002900240.1   |
|                                                                                  | <i>Picut3</i> -R             | GTTGCAGAACTCAATGGCCT                      |                  |
| Template DNA for <i>PiHmp1</i> - <i>PiCut3</i> synthesis <i>in vitro</i>         | <i>PiHmp1</i> -dsRNA-T7-F    | GTAATACGACTCACTATAGGTTGTTGACCAGCTCGTTGAG  |                  |
|                                                                                  | <i>PiHmp1</i> -dsRNA-T7-R    | GTAATACGACTCACTATAGGCCATCACCCCTTCTTCTTCCA |                  |
|                                                                                  | <i>PiCut3</i> -dsRNA-T7-F    | GTAATACGACTCACTATAGGCAACCACGTCGTGTCTATCG  |                  |
|                                                                                  | <i>PiCut3</i> -dsRNA-T7-R    | GTAATACGACTCACTATAGGGTTGCAGAACTCAATGGCCT  |                  |
| Template DNA for <i>tdTomato</i> and <i>eGFP</i> synthesis <i>in vitro</i>       | <i>tdTomato</i> - dsRNA-T7-F | GTAATACGACTCACTATAGGCAACATGGCCGTCATCAAAGA |                  |
|                                                                                  | <i>tdTomato</i> -dsRNA-T7-R  | GTAATACGACTCACTATAGGCTTGTACAGCTCGTCCATGCC |                  |
|                                                                                  | <i>eGFP</i> -dsRNA-T7-F      | TAATACGACTCACTATAGGCACAAGTTCAGCGTGCCG     |                  |
|                                                                                  | <i>eGFP</i> -dsRNA-T7-R      | TAATACGACTCACTATAGGGTTCACCTTGATGCCGTTT    |                  |
| Overlap PCR for constructing pET28a- <i>PiHmp1</i> - <i>PiCut3</i> vector        | ovhmcut3-1 ZF                | CTCGAGATGCCGATATGGGTAAGCA                 |                  |
|                                                                                  | ovhmcut3-1 ZR                | ACGAATACCGCCATCACCCCTTCTTCTTCCAC          |                  |
|                                                                                  | ovhmcut3-2 ZF                | GGGTGATGGCCGGTATTCGTCCTTGGAGGGT           |                  |
|                                                                                  | ovhmcut3-2 ZR                | AAGCTTCTCGGCCGCG                          |                  |
|                                                                                  | ovcut3hm-1 reF               | AAGCTTGTGCAGAACTCAATGGC                   |                  |
|                                                                                  | ovcut3hm-1 reR               | GGGTGATGGCCGGTATTCGTCCTTGGAGGGT           |                  |
|                                                                                  | ovcut3hm-2 reF               | ACGAATACCGCCATCACCCCTTCTTCTTCCAC          |                  |
|                                                                                  | ovcut3hm-2 reR               | TCTAGACCGATATGGGTAAGCATGT                 |                  |
| qRT-PCR for phytoalexin gene expression                                          | <i>StCoum</i> -qRT-F         | CGCCTCACAATCTCACACTC                      | OL412004.1       |
|                                                                                  | <i>StCoum</i> -qRT-R         | CGCATCTGATAGTAGGTCCGT                     |                  |
|                                                                                  | <i>StEpic</i> -qRT-F         | AGCCGGTTCCTAATGCCTTC                      | XM_006349390.2   |
|                                                                                  | <i>StEpic</i> -qRT-R         | CGTTTTGTGCGTATCAGGGTC                     |                  |
| qRT-PCR for                                                                      | <i>StEPSIN</i> -qRT-F        | TGCTTTGCTCCTTCTTACAC                      | XM_006349904.1   |

|                                                          |                          |                        |                      |
|----------------------------------------------------------|--------------------------|------------------------|----------------------|
| endocytosis gene<br>expression                           | <i>StEPSIN</i> -qRT-R    | TTCACCCCTCTCTTGAGGTC   |                      |
|                                                          | <i>StVPS36</i> -qRT-F    | CAAGAATCCACCACCTCCCC   | XM_006347647.2       |
|                                                          | <i>StVPS36</i> -qRT-R    | AATCACCACGACCCCTTTTCG  |                      |
|                                                          | <i>StRab</i> -qRT-F      | TGGTGAATGTCACTGCGCTA   | CP055242.1           |
|                                                          | <i>StRab</i> -qRT-R      | CGATTTCAACCTGTTTCGCGT  |                      |
|                                                          | <i>StVAMP1-2</i> -qRT-F  | GAAGGCTCAGGTTTCAGAAG   | XM_006364202.2       |
|                                                          | <i>StVAMP1-2</i> -qRT-R  | GTGACACTTGAAACCACCA    |                      |
|                                                          | <i>StVAMP3-1</i> -qRT-F  | GGGAACGGTGATTTTGGCTG   | XM_049539029.1       |
|                                                          | <i>StVAMP3-1</i> -qRT-R  | CGCAATGGGAAGTTGTCTGC   |                      |
| qRT-PCR for immune<br>gene expression                    | <i>StPR1</i> -qRT-F      | ATGTGGGACGATGAGAAGCA   | XM_006367028.1       |
|                                                          | <i>StPR1</i> -qRT-R      | CAAAGGCCGGTTGTTGATCT   |                      |
|                                                          | <i>StWRKY1</i> -qRT-F    | GAAGAATAAAGCCGGTTCTTGG | NM_001288675.1       |
|                                                          | <i>StWRKY1</i> -qRT-R    | CAGTTTCATGGGCAGATCATCG |                      |
|                                                          | <i>StPPO</i> -qRT-F      | GACACGAAGAAGATGGGATACG | U22921.1             |
|                                                          | <i>StPPO</i> -qRT-R      | TCGAGTTTAGCCAATGGGAAT  |                      |
|                                                          | <i>StPTI5</i> -qRT-F     | TATTCTTCGTCCATTACAG    | XM_006367134.2       |
|                                                          |                          | <i>StPTI5</i> -qRT-R   | AACAGAGGCGTTCACTA    |
| qRT-PCR for<br><i>tdTomato</i> gene                      | <i>PitdTomato</i> -qRT-F | CAACAACATGGCCGTCATCAAA |                      |
|                                                          | <i>PitdTomato</i> -qRT-R | TGTACAGCTCGTCCATGCCG   |                      |
| qRT-PCR for<br>reference <i>actin</i> gene<br>expression | <i>StEF1a</i> -qRT-F     | ATTGAAAACGGATATGCTCCA  | XM_022311019.1       |
|                                                          | <i>StEF1a</i> -qRT-R     | TCCTTACCTGAACGCCTGTCA  |                      |
|                                                          | <i>PiActin</i> -qRT-F    | CAATTCGCCACCTTCTTCGA   |                      |
|                                                          |                          | <i>PiActin</i> -qRT-R  | GCCTTCCTGCCCTCAAGAAC |

**Supplementary Table 3. Potato disease classification.**

| <b>Classification</b> | <b>Description</b>                                                 |
|-----------------------|--------------------------------------------------------------------|
| 0                     | No lesion area                                                     |
| 1                     | The lesion area accounted for less than 5% of the whole leaf area  |
| 3                     | The lesion area accounted for 6% ~ 10% of the whole leaf area      |
| 5                     | The lesion area accounted for 11% ~ 20% of the whole leaf area     |
| 7                     | The lesion area accounted for 21% ~ 50% of the whole leaf area     |
| 9                     | The lesion area accounted for more than 50% of the whole leaf area |
